# Supplementary material for: Data Assimilation with An Improved Particle Filter and Its Application in TRIGRS Landslide Model
Source: Copernicus journal article supplement (doi:10.5194/nhess-2017-439), 2018-01-02
Supplement: Supplementary file [file nhess-2017-439-AC2-supplement.pdf]

# Data Assimilation with An Improved Particle Filter and Its Application in TRIGRS Landslide Model

Changhu Xue<sup>1</sup>, Guigen Nie<sup>1</sup>, Haiyang Li<sup>1</sup>, Jing Wang<sup>1</sup>

<sup>1</sup>GNSS Research Center, Wuhan University, Wuhan, 430079, China

5 *Correspondence to:* Guigen Nie([ggnie@whu.edu.cn](mailto:ggnie@whu.edu.cn))

**Abstract.** Particle filter has become a popular algorithm in data assimilation for its capability to handle non-linear or non-Gaussian state-space models, while it still be seriously influenced by its disadvantages. In this work, an improved particle filter algorithm is proposed. To overcome the particle degeneration and improve particles' efficiency, the processes of particle resample and particle transferring are updated. In this algorithm particle-propagating and resample method are ameliorated. The new particle filter is applied to Lorenz-63 model, verified its feasibility and effectiveness using only 20 particles. The root mean square difference(RMSD) of estimations converge to stable when there are more than 20 particles. Finally, we choose a peristaltic landslide model and carry out an assimilation experiment. Results show that the estimations of states can effectively correct the running-offset of the model and the RMSD is convergent after 3 days assimilation.

**Key words.** Data assimilation, particle filter, nonlinear model, Lorenz-63, TRIGRS, landslide model

## 15 **1 Introduction**

A mount of mountainous areas have suffered frequent landslide disasters all over the world. People living in mountainous areas are faced with the threat of landslide disasters. Works of landslide monitoring, analysis and forecasting are crucial. Many numerical modeling methods of slope evolution are proposed and developed recently such as discontinuous deformation analysis (DDA) (Shi 1992, Jing, Ma et al. 2001, Ma, Kaneko et al. 2011) and distinct elements methods (DEM) (Lorig and Hobbs 1990, Marcato, Fujisawa et al. 2007, Li, He et al. 2012). Iverson proposed the mathematical model that uses Richards' equation to evaluate effects of landslides in response to rainfall infiltration(Iverson 2000). The Transient Rainfall Infiltration and Grid-based Regional Slope-stability(TRIGRS) model is a raster-based model, depends on time for transient rainfall infiltration(Baum, Savage et al. 2008). Jiang adopted the Ensemble Kalman filter to landslide movement model in relation to hydrological factors, which introduce data assimilation (DA) to landslide(Jiang, Liao et al. 2016).

25 Data assimilation is a common approach to solve an estimation of optimal state in dynamic systems. With DA algorithms and operators, DA merges different scales of observations into dynamic models to take advantage of all information. Many DA

algorithms have been developing and improving in recent years, in which particle filter (PF) is a popular algorithm for its availability under conditions of nonlinear and non-Gaussian distributed models (Arulampalam, Maskell et al. 2002, Moradkhani, Hsu et al. 2005). Increasing applications and improvements of PF have been researched recently in DA or other fields. Salamon, *et al.* (Salamon and Feyen 2009) applied the residual resampling particle filter (RRPF) to assess parameter, precipitation, and predictive uncertainty in rainfall–runoff model. Thirel, *et al.* (Thirel, Salamon et al. 2013) assimilated the snow cover area in physical distributed hydrological models and MODIS satellite data to improve the pan-European flood forecasts. Mattern, *et al.* (Mattern, Dowd et al. 2013) carried out assimilation experiments for a three-dimensional biological ocean model and satellite observations and verified the feasibility of biological state estimation with sequential importance resampling (SIR) for realistic models.

However, large computational complexity and particle degradation or collapse are still obstacles in PF. To solve these problems, some resample algorithms have been proposed. One improvement is adding an item related to observations, to make the proposal density dependent on the future observations, accordingly most particles could situate into the range of observation error (van Leeuwen 2010). It can get good results to using only 10~20 particles in high dimensional assimilation experiments. But the number of key particles are reduced when the system variance is larger than the observed variance, and the values of added items are uncertain. Another improvement is to replace the duplicated process by generating a Halton sequence in residual resampling (Zhang, Qin et al. 2013). The disordered particle sets are turned into ordered and too few particles can hardly describe the posterior probability density function (PDF) better.

In section 2, a new resampling approach is proposed to improve the above method, keeping both particles' diversity and efficiency. The new algorithm formula and implementation process are listed in the text. To evaluate the safety factor of peristaltic landslide in slow deformation process, a simulation experiment, applying to Lorenz-63 model using different numbers of particles range from 10~200, is explained in section 3, which demonstrates that the new method has shown its efficiency and sensitivity to the number of particles. Finally, a rainfall infiltration landslide model case is analyzed. We choose an experimental landslide model with a 10 \* 10 grid as background to conduct an assimilation experiment. The improved assimilation algorithm is applied to TRIGRS program to evaluate the change of FS in the experimental model.

## 2 Improvements of Residual Resampling Particle Filtering

In sequential importance sampling, the state vector is represented by a set of particles

$$x_k = f(x_{k-1}) + G_k(x_{k-1})\varepsilon_k \quad (1)$$

where  $x$  is the state vector with initial PDF  $p(x_0)$ ,  $k$  is the subscript of time steps,  $\varepsilon_{k-1}$  is system noise with zero mean at step  $k-1$ ,  $f(\cdot)$  is model operator. Initial  $N$  particles are sampled from  $p(x_0)$ . The observation equation is

$$z_k = h(x_k) + \eta_k \quad (2)$$

where  $z$  is the observation vector,  $h(\cdot)$  is observation operator. Weights of particles are calculated by (3), and normalized to get  $w_k^i$

$$\tilde{w}_k^i = w_{k-1}^i \cdot \frac{p(z_k | x_k^i) p(x_k^i | x_{k-1}^i)}{q(x_k^i | x_{k-1}^i, z_k)} \quad (3)$$

$$w_k^i = \frac{\tilde{w}_k^i}{\sum_{j=1}^N \tilde{w}_k^j} \quad (4)$$

5 where  $p(z_k | x_k^i)$  is the likelihood of observation,  $q(x_k^i | x_{k-1}^i, z_k)$  is the proposal function.

Residual resample is a way to solve the problem of particle degeneracy which is an unavoidable trouble in standard PF. With the recursive progress, the weights of particles are gradually concentrated on a few samples and others are tend to be zero. To keep most particles effective, low-weight particles are removed and high-weight particles are duplicated. This causes that the particle sets can hardly represent the prior PDF due to the declining of particles diversity.

10 Some improvements about residual resample algorithm are proposed in this paper. Firstly, in the process of particle transferring, we choose

$$x_k^i = f(x_{k-1}^i) + \hat{\varepsilon}_{k-1} + J_k [z_k - h(\hat{x}_{k-1})] \quad (5)$$

where  $J_k$  is a coefficient like the ‘‘gain’’ in extended Kalman filter:

$$\left. \begin{aligned} J_k &= D_{k/k-1} B_k^T [B_k D_{k/k-1} B_k^T + R_k]^{-1} \\ D_{k/k-1} &= A_{k-1} D_{k-1/k-1} A_{k-1}^T + G_{k-1} (\hat{x}_{k-1}) Q_{k-1} G_{k-1}^T (\hat{x}_{k-1}) \end{aligned} \right\} \quad (6)$$

15 in which  $A_k$ ,  $B_k$  are the linearization parameter of  $f(\bullet)$  and  $h(\bullet)$ , respectively:

$$A_k = \frac{\partial f_k}{\partial x_k} (\hat{x}_k), \quad B_k = \frac{\partial f_k}{\partial x_k} (\hat{x}_{k/k-1}) \quad (7)$$

$D_{k/k}$  is estimation variance of state  $x_k$  at step  $k$ . This process is equal to translate particles close to observations. But the value of  $J_k$  is hard to determine because the variance of state estimation  $D_{k-1/k-1}$  in PF is difficult to compute. To simplify the calculation, suppose that the translated particles are a series of virtual observations about the state at step  $k$ . Write the particle set as:

$$X_{k/k}^N = \{x_{k/k}^i\}_{i=1,2,\dots,N} \quad (8)$$

and replace  $D_{k-1/k-1}$  with the variance of particles. To keep the value of  $D_{k-1/k-1}$  unchanged before and after translation, we choose the posterior particles at step  $k-1$ :

$$D_{k-1/k-1} = \text{var}(X_{k-1/k-1}) \quad (9)$$

Secondly, using the method of Zhang *et al.* (Zhang, Qin et al. 2013) to compute accumulative copy times (ACT), each parent particles with high weights regenerates a set of new particles. Differently, instead of duplicating or generating Halton sequence, it generates a series of normal-distributed particles:

$$\{x_k^1, x_k^2, \dots, x_k^{ACT_i}\} \sim N(x_k^i, G_k(x_k^i))$$

- 5 where  $ACT_i$  is the ACT of the  $i$ th particle, the mean and variance are related on the value of parent. Accordingly, the resampled particle set is composed of some different particle sets which obey normal distribution. Assume that the  $j$ th progeny particle of  $x_k^i$  is written as  $x_k^{ij}$ , the formula (3) can be written as:

$$\tilde{w}_k^{ij} = w_{k-1}^i \cdot \frac{p(z_k | x_k^{ij}) p(x_k^{ij} | x_{k-1}^i)}{q(x_k^{ij} | x_{k-1}^i, z_k)} \quad (10)$$

Shortly, the improved RRPF in this section can be implemented by the following steps:

- 10 Step 1: Draw initial particles  $\{x_0^i\}$  from prior PDF  $p(x_0)$ .

Step 2: Compute the mean and variance of posterior particles at step  $k-1$ :

$$\bar{x}_{k-1/k-1} = \frac{1}{N} \sum_{i=1}^N x_{k-1/k-1}^i \quad (11)$$

$$D_{k-1/k-1} = \frac{1}{N-1} \sum_{i=1}^N (x_{k-1/k-1}^i - \bar{x}_{k-1/k-1})(x_{k-1/k-1}^i - \bar{x}_{k-1/k-1})^T \quad (12)$$

Step 3: Using the new method in this section, compute the ‘‘gains’’ of particles:

15 
$$D_{k/k-1} = \left[ \frac{\partial f_k}{\partial x_k}(\hat{x}_k) \right] D_{k-1/k-1} \left[ \frac{\partial f_k}{\partial x_k}(\hat{x}_k) \right]^T + G_{k-1}(\hat{x}_{k-1}) Q_{k-1} G_{k-1}^T(\hat{x}_{k-1}) \quad (13)$$

$$J_k = D_{k/k-1} \left[ \frac{\partial f_k}{\partial x_k}(\hat{x}_{k/k-1}) \right] \left\{ \left[ \frac{\partial f_k}{\partial x_k}(\hat{x}_{k/k-1}) \right] D_{k-1/k-1} \left[ \frac{\partial f_k}{\partial x_k}(\hat{x}_{k/k-1}) \right]^T + R_k \right\}^{-1} \quad (14)$$

Step 4: Transfer the particles close to the observation:

$$x_k^i = f(x_{k-1}^i) + \hat{\epsilon}_{k-1} + J_k [z_k - h(\hat{x}_{k-1})] \quad (15)$$

- 20 Step 5: Residual resampling. Each particle generates a set of normal-distributed progeny particles, and all progeny sets make up the resampled particle set:

$$\{x_k^{i1}, x_k^{i2}, \dots, x_k^{iACT_i}\} = X_k^{iACT_i} \sim N(x_k^i, G_k(x_k^i)) \quad (16)$$

$$\{X_k^{1ACT_1}, X_k^{2ACT_2}, \dots, X_k^{NACT_N}\} = \{x_k^{*i}\}_{i=1,2,\dots,N} \quad (17)$$

When  $ACT_i = 0$ ,  $X_k^{iACT_i}$  is empty set.

Step 6: Compute and normalize weights:

$$\tilde{w}_k^j = w_{k-1}^j \cdot p(z_k | x_k^i) \quad (18)$$

$$w_k^j = \frac{\tilde{w}_k^j}{\sum_{j=1}^N \tilde{w}_k^j} \quad (19)$$

Step 7: Compute the state estimation:

$$\hat{x}_{k/k} = \sum_{i=1}^N x_k^{*i} \cdot w_k^i \quad (20)$$

5 A measure to assess the accuracy of calculation is the root mean square difference (RMSD), which is defined as

$$RMSD = \sqrt{\frac{1}{T} \sum_{t=1}^T (\hat{X}_t - X_t^{obs})^2} \quad (21)$$

where  $T$  is the period of assimilation,  $\hat{X}_t$  and  $X_t^{obs}$  are the assimilated value and the observation of state at time  $t$ .

### 3 Application to Lorenz-63 model

We choose the Lorenz-63 model as an example to test the improved algorithm(Baines 2008).

$$\begin{aligned} \frac{dx}{dt} &= \sigma(y - x) \\ 10 \quad \frac{dy}{dt} &= x(\rho - z) - y \\ \frac{dz}{dt} &= xy - \beta z \end{aligned} \quad (22)$$

where The constants  $\sigma$ ,  $\rho$  and  $\beta$  are system parameters proportional to the Prandtl number, Rayleigh number, and certain physical dimensions of the layer itself. Parameters are given by:  $dt = 0.01$ ,  $\sigma = 10$ ,  $\rho = 28$ ,  $\beta = 8/3$ , the observation error  $\sigma_{obs} = \sqrt{2}$ , model transmission error based on time interval  $\sigma_{mod} = 2\sqrt{\Delta t}$ . Initialize the filter with the starting point which is set to  $(x_0, y_0, z_0) = (1.50887, -1.531271, 25.46091)$ . The truth is obtained by the formula of the model recursively.

15 Observations are generated from the truth by adding a disturbance every 40 steps. Recurs 1000 steps, assimilate the observation with the model when observation exists at current step and recurs to next step when there is no observation.

Figure 1 shows the results of  $x$ -component using new PF with 20 particles. Note that the new PF procedure is close to the truth with much fewer particles which is more efficient than standard PF with hundreds of particles. Compute the confidence interval with 95% level using the posterior particles every step. Figure 2 shows that the intervals contain observations at almost all the steps with observations exist. That means particle sets after translation are very close to observations and true states. The evolution of all particles is displayed in Figure 3, in which most particles are very close to observations except for several ones

20

at moments with state changed obviously. The RMSD sequence is shown in Figure 4, it tends to be stable when the number of particles is more than 20. This means the improved algorithm only needs no less than 20 particles.

#### 4 Application to landslide simulation based on TRIGRS model

5 TRIGRS is a program modelling rainfall infiltration, using analytical solutions for partial differential equations which represents one-dimensional, vertical flow in isotropic, homogeneous materials for simply saturated or unsaturated conditions. It computes changes of rainfall pore-pressure, factor of safety(FS) with rainfall infiltration. The FS is computed using a simple infinite-slope model cell-by-cell.

In this experiment, the FS is applied to assimilation. It is calculated as follow:

$$F_s = \frac{\tan \phi}{\tan \alpha} + \frac{c - \varphi(Z, t) \gamma_w \tan \phi}{\gamma_s Z \sin \alpha \cos \alpha} \quad (23)$$

10 in which  $c$  is soil cohesion,  $\alpha$  is slope angle,  $\phi$  is soil friction angle,  $\varphi$  is the ground-water pressure head depending on depth  $Z$  and time  $t$ ,  $\gamma_w$  is ground-water unit weight and  $\gamma_s$  is soil unit weight at saturation.

An example of 10 \* 10 grid TRIGRS model is set to be the background, and each grid cell is a square with a length of 10 meters. The simulated observations are generated from the  $F_s$  by adding a disturbance with normal distribution  $N(0.2, 0.3)$ . Due to the difficulties of determining the parameter  $\varphi$ , the soil friction angle, and its highly sensitivity to results, we now generate a set of particle  $\{\varphi_k^i\}$  form  $\varphi$ , in which  $k, i$  are indices of step and particle number respectively. The input model variance of  $\varphi$  is 2 and observation variance of  $F_s$  is 0.3. At each step,  $\varphi$  and  $F_s$  will be updated, and the updated parameters continue to participate in the next step operation as initial parameters. The number of particles is set to 20 in the particle filter program. Figure 5 shows the model-running results and the assimilated results of FS running for 5 days, 10 days, 15 days, 20days, respectively. In the model-running results, the value of FS is smaller and decreasing rapidly, which in the assimilated results the change is relatively gentle.

20 To evaluate the distribution variation of  $\varphi$ , we propose that the estimation of  $\varphi$  is calculated as formula

$$\hat{\varphi}_{k/k} = \sum_{i=1}^N \varphi_k^i \cdot w_k^i \quad (24)$$

in which  $w_k^i$  is calculated using formula (18) and (19). Actually, the estimation of  $\varphi$  uses the same method and particles of the estimation of  $F_s$ . Figure 6 shows the distribution variation of  $\varphi$  running for 5 days, 10days, 15days and 20 days, respectively. The change of  $\varphi$  estimation in a single cell is illustrated in Figure 7, considering the middle unit, grid cell (5, 5). To assess estimations of all grid cells, the root mean square difference of the whole grid of points to measure the estimated error is modified to

$$RMSD_{grid} = \sqrt{\frac{1}{N_p} \sum_{i,j} (\hat{X}_{ij} - X_{ij}^{obs})^2} \quad (25)$$

where  $N_p$  is the total number of grid points,  $i, j$  are the indices of the row and column number respectively. The RMSD curve with assimilating days is shown in Figure 8 which suggests the value is large in the first 2 days of initialization, fluctuating in next days and steady when there are no observations.

## 5 Conclusion and discussion

The problems of particle degeneration and efficient expression of posterior PDF are long-term difficulties which affect the performance of particle filter. Many resampling methods can improve effectiveness of particles, but they still need a large number of samples resulting in a large amount of computation.

In this study, we propose two approaches to improve the particle filter process. Firstly, for the problem of particle degeneration, new Gaussian-distributed offspring particles are generated for each mother particle. It can avoid particle duplication and maintain particles' diversity. Secondly, in order to improve the propagating efficiency of a priori particle into a posteriori particle, an additional item is added which is similar to the Kalman gain at the step of particle propagation, which greatly reduces the number of particles required. It uses only dozens of particles to get good results. Simulating experiment of Lorenz-63 model is carried out to validate the feasibility of these methods. The TRIGRS landslides model is firstly proposed to apply to the assimilation system. Results show that the assimilating process can make the estimation close to observations, which proved the availability of applying the improved particle filter to landslide model.

However, some disadvantages are still present. Grid cells are independent of each other in TRIGRS, this leads to the FS estimations are possible to be greater than the actual values. Therefore, the FS estimations only provide references for the actual values. The experiment needs improvement.

**Acknowledgments.** This work is financially supported by the National Key Basic Research Program of China (Grant No. 2013CB733205).

## References

- Arulampalam, M. S., S. Maskell, N. Gordon and T. Clapp (2002). "A tutorial on particle filters for online nonlinear/non-Gaussian Bayesian tracking." Ieee Transactions on Signal Processing **50**(2): 174-188.
- Baines, P. G. (2008). "Lorenz, EN 1963: Deterministic nonperiodic flow. Journal of the Atmospheric Sciences 20, 130-41." Progress in Physical Geography **32**(4): 475-480.
- 5 Baum, R. L., W. Z. Savage and J. W. Godt (2008). "TRIGRS—A Fortran Program for Transient Rainfall Infiltration and Grid-Based Regional Slope-Stability Analysis, version 2.0." U.S. Geological Survey Open-File Report **2008-1159**: 75.
- Iverson, R. M. (2000). "Landslide triggering by rain infiltration." Water Resources Research **36**(7): 1897-1910.
- Jiang, Y. A., M. S. Liao, Z. W. Zhou, X. G. Shi, L. Zhang and T. Balz (2016). "Landslide Deformation Analysis by  
10 Coupling Deformation Time Series from SAR Data with Hydrological Factors through Data Assimilation." Remote Sensing **8**(3).
- Jing, L. R., Y. Ma and Z. L. Fang (2001). "Modeling of fluid flow and solid deformation for fractured rocks with discontinuous deformation analysis (DDA) method." International Journal of Rock Mechanics and Mining Sciences **38**(3): 343-355.
- 15 Li, X. P., S. M. He, Y. Luo and Y. Wu (2012). "Simulation of the sliding process of Donghekou landslide triggered by the Wenchuan earthquake using a distinct element method." Environmental Earth Sciences **65**(4): 1049-1054.
- Lorig, L. J. and B. E. Hobbs (1990). "Numerical Modeling of Slip Instability Using the Distinct Element Method with State Variable Friction Laws." International Journal of Rock Mechanics and Mining Sciences & Geomechanics Abstracts **27**(6): 525-534.
- 20 Ma, G. C., F. Kaneko, S. Hori and M. Nemoto (2011). "Use of Discontinuous Deformation Analysis to Evaluate the Dynamic Behavior of Submarine Tsunami-Generating Landslides in the Marmara Sea." International Journal of Computational Methods **8**(2): 151-170.



- Marcato, G., K. Fujisawa, M. Mantovani, A. Pasuto, S. Silvano, F. Tagliavini and L. Zabuski (2007). "Evaluation of seismic effects on the landslide deposits of Monte Salta (Eastern Italian Alps) using distinct element method." Natural Hazards and Earth System Sciences **7**(6): 695-701.
- 5 Mattern, J. P., M. Dowd and K. Fennel (2013). "Particle filter-based data assimilation for a three-dimensional biological ocean model and satellite observations." Journal of Geophysical Research-Oceans **118**(5): 2746-2760.
- Moradkhani, H., K. L. Hsu, H. Gupta and S. Sorooshian (2005). "Uncertainty assessment of hydrologic model states and parameters: Sequential data assimilation using the particle filter." Water Resources Research **41**(5): 17.
- Salamon, P. and L. Feyen (2009). "Assessing parameter, precipitation, and predictive uncertainty in a distributed hydrological model using sequential data assimilation with the particle filter." Journal of Hydrology **376**(3-4): 428-442.
- 10 Shi, G. H. (1992). "Discontinuous Deformation Analysis: A New Numerical Model for the Statics and Dynamics of Deformable Block Structures." Engineering Computations **9**(2): 157-168.
- Thirel, G., P. Salamon, P. Burek and M. Kalas (2013). "Assimilation of MODIS Snow Cover Area Data in a Distributed Hydrological Model Using the Particle Filter." Remote Sensing **5**(11): 5825-5850.
- 15 van Leeuwen, P. J. (2010). "Nonlinear data assimilation in geosciences: an extremely efficient particle filter." Quarterly Journal of the Royal Meteorological Society **136**(653): 1991-1999.
- Zhang, H. J., S. X. Qin, J. W. Ma and H. J. You (2013). "Using Residual Resampling and Sensitivity Analysis to Improve Particle Filter Data Assimilation Accuracy." Ieee Geoscience and Remote Sensing Letters **10**(6): 1404-1408.

## Figures

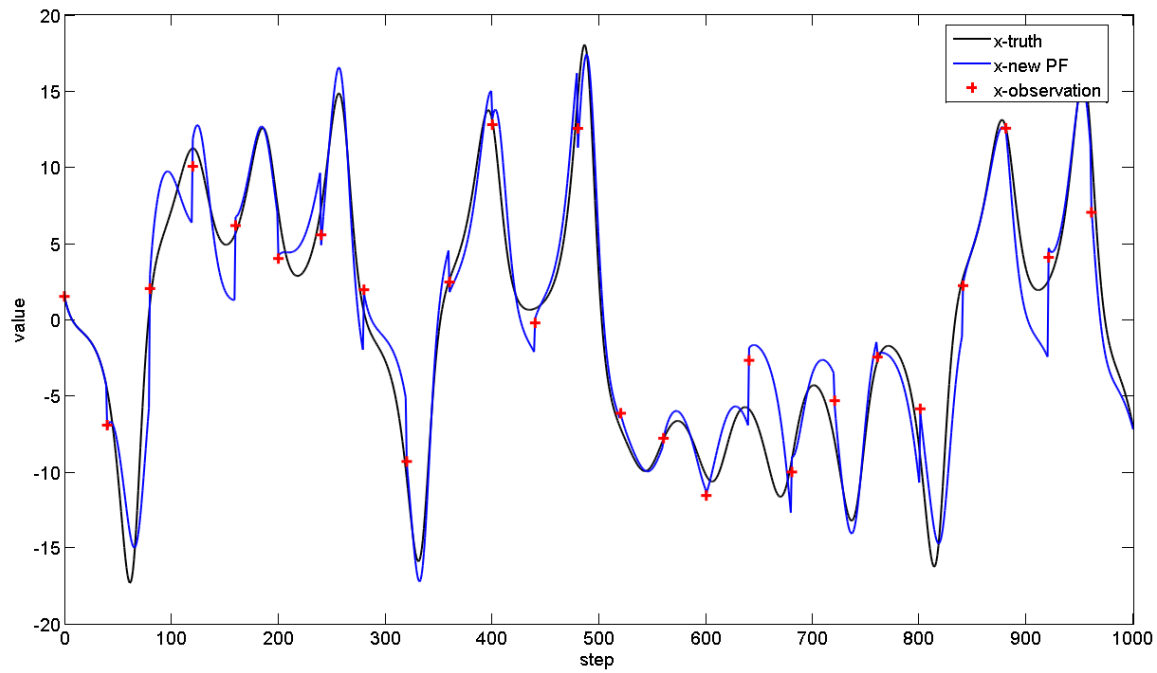

**Figure 1: Results of new PF for the Lorenz-63 model of  $x$ -component. The red crosses are observations, the black line is the true state and the blue line is the new PF results.**

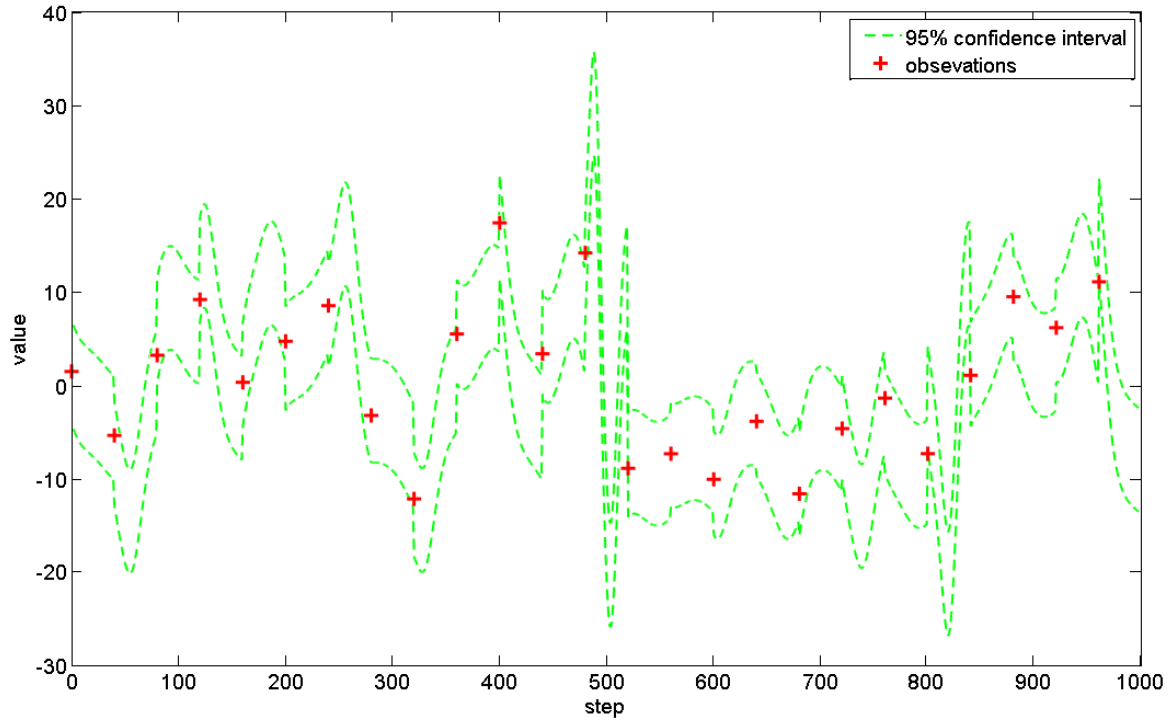

**Figure 2.** The 95% confidence interval computed by posterior particles. The green dashed lines donate the upper and lower limits of the interval and the red crosses are obsevation.

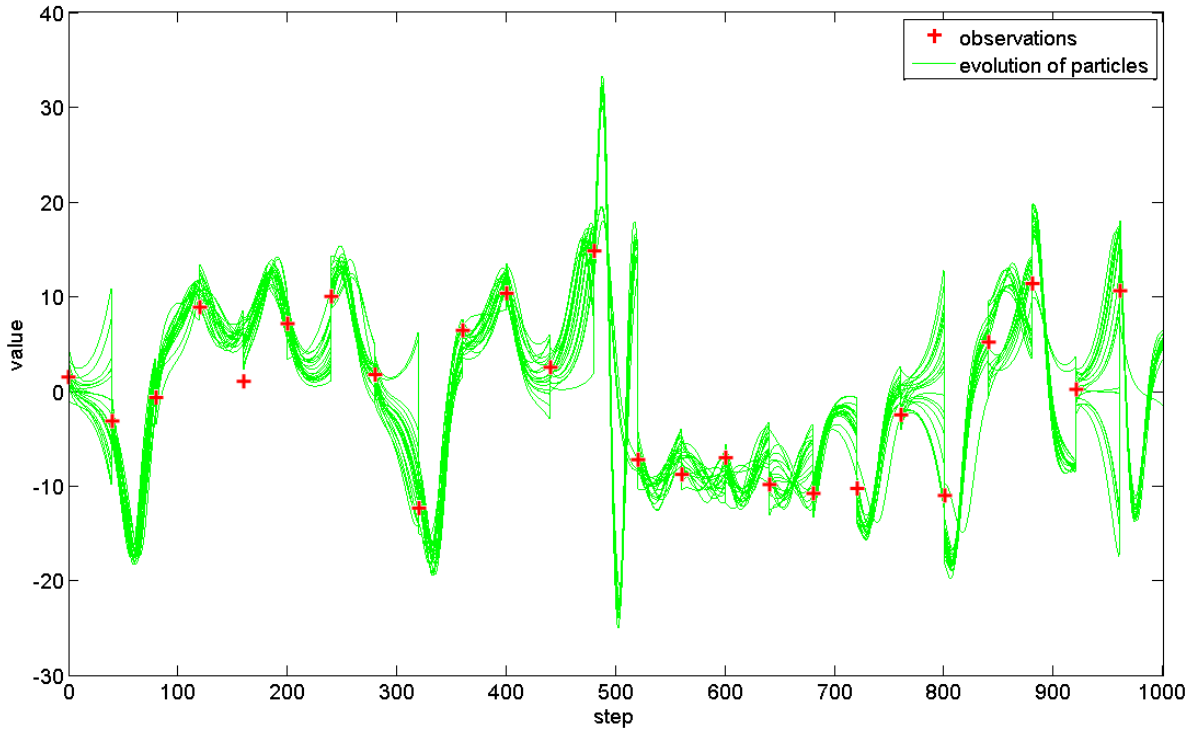

**Figure 3.** The evolution of posterior particles in time. The green dashed lines show the traces of all particles, the red crosses donate the observations.

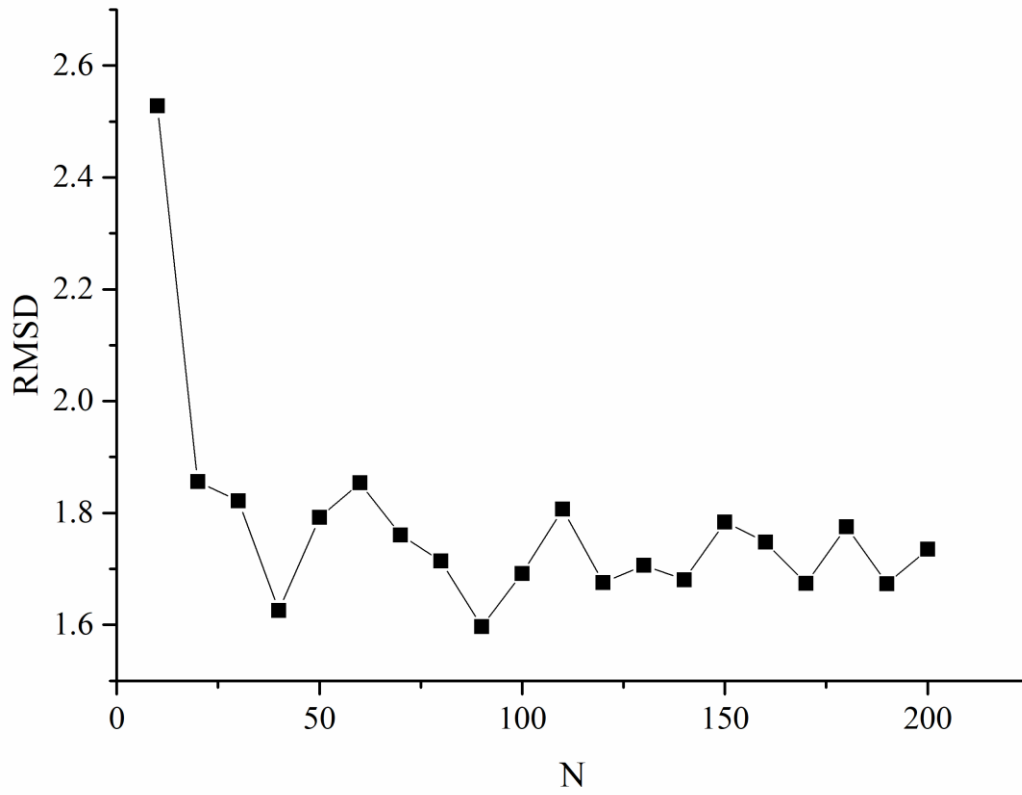

**Figure 4. RMSD of the estimation with respect to particle numbers. The value is relatively high when the particle number is less than 20, and tend to be stable when more than 20.**

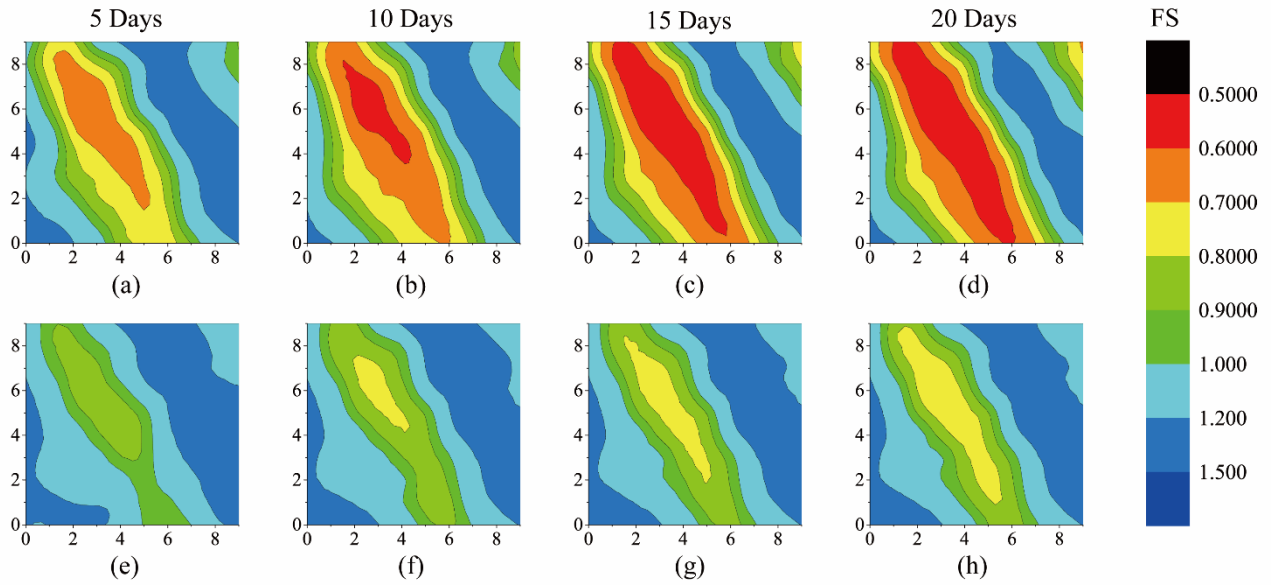

**Figure 5. Model results and assimilation results of FS. The maps in the first row are the model results running for 5, 10, 15, 20 days respectively, and that in the second row are the assimilation results. The horizontal and vertical coordinates in each graph are grid numbers of each cell.**

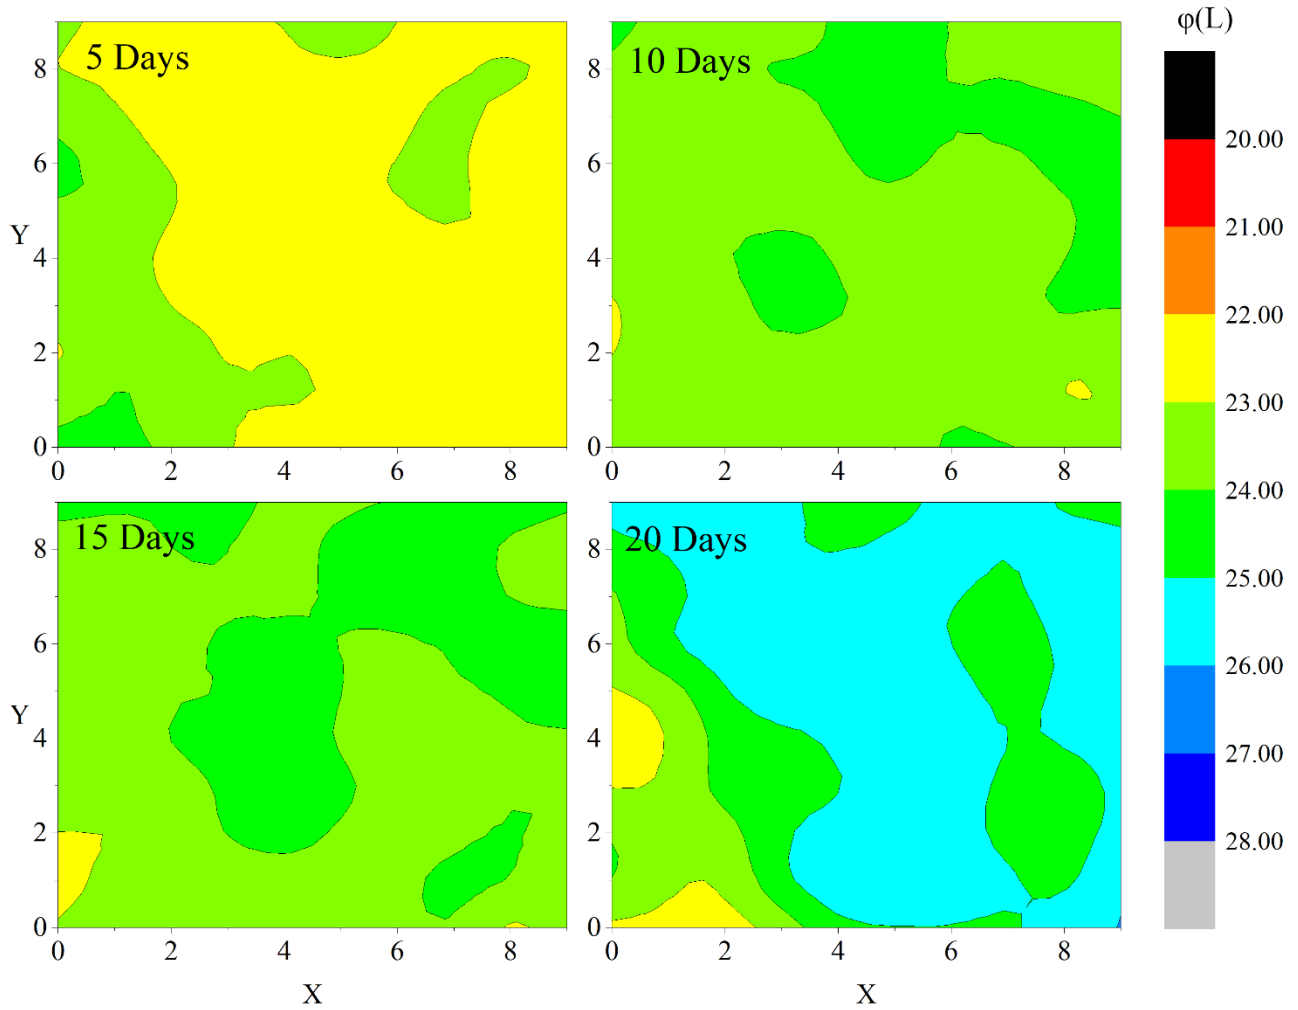

**Figure 6. The distribution variation of groundwater pressure head ( $\varphi$ ) with assimilated time. The horizontal and vertical coordinates in each graph are grid numbers of each cell.**

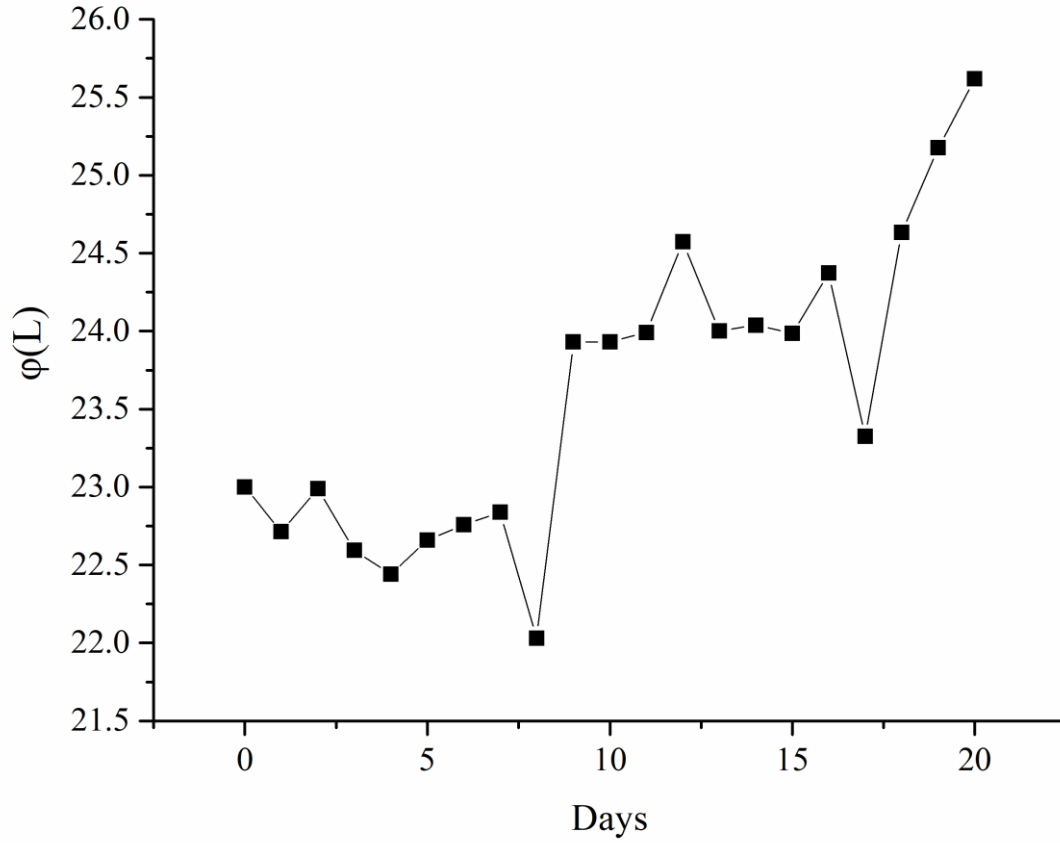

**Figure 7. The changing line of the groundwater pressure head ( $\varphi$ ) estimation of grid cell (5, 5) with assimilating time. The value is growing with the evolution of the landslide.**



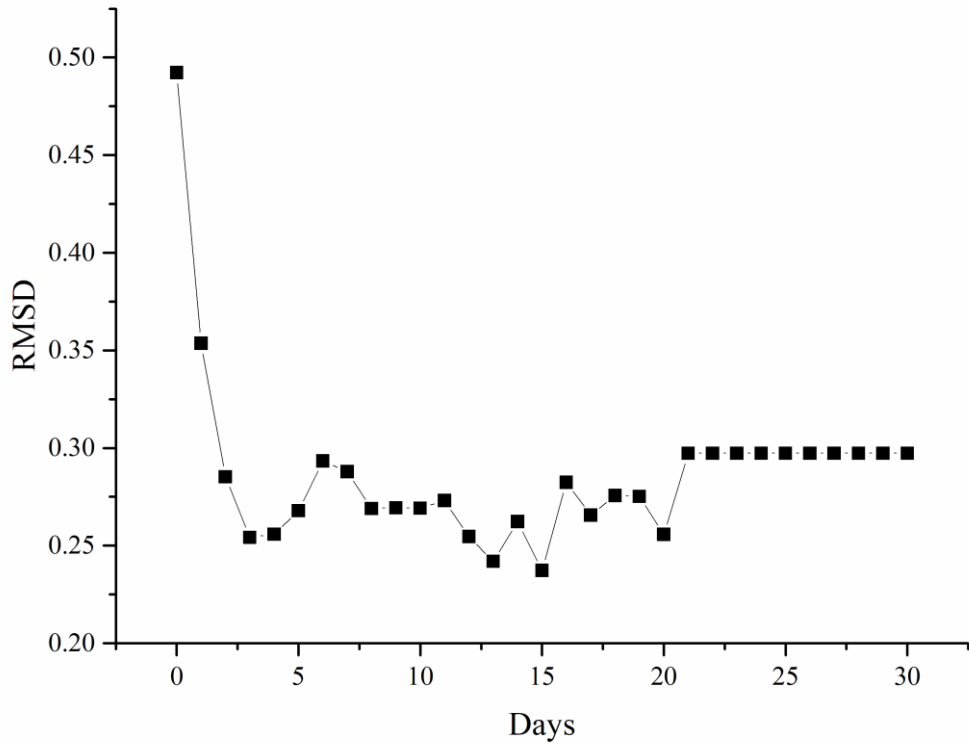

**Figure 8. RMSD line of all grids depending on assimilating time. The TRIGRS model is assimilated with observations in the first 20 days, and results of 21~30th days are model-running results without observations assimilated.**
